# Supplementary material for: Heterostructured FeNi hydroxide for effective electrocatalytic oxygen evolution
Source: Royal Society of Chemistry journal article supplement (doi:10.1039/d2sc02767d), 2022-01-01
Supplement: d2sc02767d1.pdf [file d2sc02767d1.pdf]

## Electronic Supplementary Information

### **A Heterostructured FeNi Hydroxide for Effective Electrocatalytic Oxygen Evolution**

*Fayan Li,<sup>a</sup> Yanyan Li,<sup>a</sup> Lei Li,<sup>a</sup> Wen Luo,<sup>b</sup> Zhouguang Lu,<sup>b</sup> Xinyu Zhang,<sup>a,\*</sup> and Zhiping Zheng<sup>a,\*</sup>*

<sup>a</sup> Department of Chemistry, Guangdong Provincial Key Laboratory of Energy Materials for Electric Power, Southern University of Science and Technology (SUSTech), Shenzhen 518055, China; Key Laboratory of Energy Conversion and Storage Technologies (SUSTech), Ministry of Education, Shenzhen 518055, China

<sup>b</sup> Department of Materials Science and Engineering, SUSTech, Shenzhen 518055, China

\*Corresponding Authors: Xinyu Zhang (zhangx1@sustech.edu.cn), Zhiping Zheng (zhengzp@sustech.edu.cn)

## Contents

|                                                                                                                |    |
|----------------------------------------------------------------------------------------------------------------|----|
| <b>1. Experimental Procedures</b> .....                                                                        | 4  |
| <b>1.1. Materials</b> .....                                                                                    | 4  |
| <b>1.2. Synthesis</b> .....                                                                                    | 4  |
| 1.2.1. Synthesis of FeNi/Ni HS .....                                                                           | 4  |
| 1.2.2. Synthesis of FeOOH .....                                                                                | 4  |
| 1.2.3. Synthesis of $\text{Ni}_2(\text{CO}_3)(\text{OH})_2$ .....                                              | 4  |
| 1.2.4. Synthesis of the Physical Mixture of FeOOH and $\text{Ni}_2(\text{CO}_3)(\text{OH})_2$ .....            | 4  |
| 1.2.5. Synthesis of Ni-doped FeOOH .....                                                                       | 5  |
| 1.2.6. Synthesis of $\text{Co}(\text{CO}_3)_{0.5}(\text{OH})$ .....                                            | 5  |
| 1.2.7. Synthesis of the Physical Mixture of FeOOH and $\text{Co}(\text{CO}_3)_{0.5}(\text{OH})$ .....          | 5  |
| 1.2.8. Synthesis of Co-doped FeOOH .....                                                                       | 5  |
| 1.2.9. Synthesis of FeCo/Co HS .....                                                                           | 5  |
| <b>1.3. Characterization</b> .....                                                                             | 5  |
| <b>1.4. Electrocatalytic Research</b> .....                                                                    | 6  |
| 1.4.1. Electrocatalytic Measurements .....                                                                     | 6  |
| 1.4.2. Calculation of ECSA-normalized Current Density .....                                                    | 7  |
| 1.4.3. Calculation of Mass Activity and TOF .....                                                              | 7  |
| 1.4.4. Measurement of the Faradic Efficiency .....                                                             | 8  |
| <b>2. Supporting Figures and Tables</b> .....                                                                  | 9  |
| <b>Figure S1.</b> Crystal Structures of (a) FeOOH and (b) $\text{Ni}_2(\text{CO}_3)(\text{OH})_2$ .....        | 9  |
| <b>Figure S2.</b> TEM Images of FeNi/Ni HS .....                                                               | 9  |
| <b>Figure S3.</b> Cs-corrected TEM Characterizations of “torso” .....                                          | 10 |
| <b>Figure S4.</b> The Basic Structural Unit of the Gelatin Molecule .....                                      | 10 |
| <b>Figure S5.</b> Growth Characteristics of FeNi/Ni HS over a Course of 36 h .....                             | 11 |
| <b>Figure S6.</b> Other Conditions-dependent Growth Characteristics of FeNi/Ni HS .....                        | 12 |
| <b>Figure S7.</b> Morphological and Structural Characterizations of the Compared Samples .....                 | 13 |
| <b>Figure S8.</b> TEM Images of Different FeNi/Ni HS More Ratios .....                                         | 14 |
| <b>Figure S9.</b> $C_{dl}$ calculations of catalysts .....                                                     | 14 |
| <b>Figure S10.</b> Typical Cyclic Voltammetry Curves .....                                                     | 15 |
| <b>Figure S11.</b> Ring Current Measurements .....                                                             | 16 |
| <b>Figure S12.</b> Morphological and Structural Characterizations after the 40-h Test .....                    | 16 |
| <b>Figure S13.</b> XPS spectra of the FeNi/Ni HS before and after OER test .....                               | 17 |
| <b>Figure S14.</b> Schematics of the Electronic Interplay between Ni and Fe via Oxo Bridge in FeNi/Ni HS ..... | 17 |
| <b>Figure S15.</b> The Characterizations of Ni Vacancies in the “Wing” Region C .....                          | 18 |

|                                                                                         |    |
|-----------------------------------------------------------------------------------------|----|
| <b>Figure S16.</b> <i>In-situ</i> Raman Spectra of FeOOH.....                           | 18 |
| <b>Figure S17.</b> Characterization and Properties of FeCo/Co HS.....                   | 19 |
| <b>Table S1.</b> ICP Analysis of FeNi/Ni HS with Different Metal Ratios.....            | 20 |
| <b>Table S2.</b> Changes in Metal Content of FeNi/Ni HS over a Course of 36 hours ..... | 20 |
| <b>Table S3.</b> Comparisons of the Catalytic Performance with Reported Catalysts.....  | 21 |
| <b>3. Reference</b> .....                                                               | 23 |

## 1. Experimental Procedures

### 1.1. Materials

$\text{FeCl}_3 \cdot 6\text{H}_2\text{O}$  ( $\geq 99.0\%$ , Shanghai Titan Scientific Co., Ltd.),  $\text{NiCl}_2 \cdot 6\text{H}_2\text{O}$  ( $\geq 99.0\%$ , Shanghai Titan Scientific Co., Ltd.),  $\text{CoCl}_2 \cdot 6\text{H}_2\text{O}$  ( $\geq 99.0\%$ , Shanghai Titan Scientific Co., Ltd.), gelatin ( $\text{C}_{102}\text{H}_{151}\text{N}_{31}\text{O}_{39}$ , G7041-500G, Sigma-Aldrich), urea ( $\text{CO}(\text{NH}_2)_2$ , 99.0%, Shanghai Titan Scientific Co., Ltd.) were used as received without further purification. Deionized (DI) water was used in all experiments.

### 1.2. Synthesis

#### 1.2.1 Synthesis of FeNi/Ni HS

A solution was prepared by dissolving  $\text{FeCl}_3 \cdot 6\text{H}_2\text{O}$  (2.16 g, 8 mmol) and  $\text{NiCl}_2 \cdot 6\text{H}_2\text{O}$  (2.85 g, 12 mmol) in 40 mL of DI water with sonication, to which an aqueous solution of gelatin (8 mL) was prepared by dissolving 1 g of gelatin in 9 mL of DI water at  $85\text{ }^\circ\text{C}$ ) was slowly added over 15 min with sonication, followed by the addition of 8 g of urea. The resulting mixture was sonicated for another 20 min till a clear solution was obtained. The reaction continued at  $100\text{ }^\circ\text{C}$  for 36 h. The reaction mixture was then cooled to room temperature and then centrifuged at 8000 rpm for 5 min. The precipitate was collected and washed with absolute ethanol and DI water three times and dried at  $60\text{ }^\circ\text{C}$  in a vacuum oven.

#### 1.2.2. Synthesis of FeOOH

The synthetic procedure of FeOOH was similar to that of FeNi/Ni HS, except that with the use of  $\text{FeCl}_3 \cdot 6\text{H}_2\text{O}$  (2.70 g, 10 mmol), DI water (20 mL), and urea (3 g).

#### 1.2.3. Synthesis of $\text{Ni}_2(\text{CO}_3)(\text{OH})_2$

The synthetic procedure of  $\text{Ni}_2(\text{CO}_3)(\text{OH})_2$  was similar to that of FeNi/Ni HS, except that with the use of  $\text{NiCl}_2 \cdot 6\text{H}_2\text{O}$  (2.38 g, 10 mmol), DI water (20 mL), and urea (3 g).

#### 1.2.4. Synthesis of the Physical Mixture of FeOOH and $\text{Ni}_2(\text{CO}_3)(\text{OH})_2$

The physical mixture was prepared by mixing FeOOH (0.71 g, 8 mmol) and Ni<sub>2</sub>(CO<sub>3</sub>)(OH)<sub>2</sub> (1.27 g, 6 mmol).

#### **1.2.5. Synthesis of Ni-doped FeOOH**

Ni-doped FeOOH was obtained by reacting according to the synthesis conditions of FeNi/Ni HS for 3h.

#### **1.2.6. Synthesis of Co(CO<sub>3</sub>)<sub>0.5</sub>(OH)**

The synthetic procedure of Co(CO<sub>3</sub>)<sub>0.5</sub>(OH) was similar to that of FeNi/Ni HS, except that with the use of CoCl<sub>2</sub>·6H<sub>2</sub>O (2.38 g, 10 mmol), DI water (20 mL), and urea (3 g).

#### **1.2.7. Synthesis of the Physical Mixture of FeOOH and Co(CO<sub>3</sub>)<sub>0.5</sub>(OH)**

The physical mixture was prepared by mixing FeOOH (0.89 g, 10 mmol) and Co(CO<sub>3</sub>)<sub>0.5</sub>(OH) (1.06 g, 10 mmol).

#### **1.2.8. Synthesis of Co-doped FeOOH**

Co-doped FeOOH was obtained by reacting according to the synthesis conditions of FeNi/Ni HS for 3h.

#### **1.2.9. Synthesis of FeCo/Co HS**

The synthetic procedure of FeCo/Co HS was similar to that of FeNi/Ni HS, except that with a mixture of FeCl<sub>3</sub>·6H<sub>2</sub>O (2.70 g, 10 mmol) and CoCl<sub>2</sub>·6H<sub>2</sub>O (2.38 g, 10 mmol).

### **1.3. Characterization**

The field emission scanning electron microscopy (SEM) images were taken on a Merlin scanning electron microscopy with an accelerating voltage of 5 kV. Transmission electron microscope (TEM) images were acquired on a Hitachi HT-7700 (Japan) transmission electron microscope with an accelerating voltage of 100 kV. Atomic-resolution high-angle annular dark field-scanning transmission electron microscopy (HAADF-STEM) images, energy-dispersive X-

ray spectroscopy (EDX), and electron energy loss spectroscopy (EELS) characterizations were performed with a Titan Themis G2 operating at 300 kV.

X-ray diffraction (XRD) patterns of the dried samples were measured in a Rigaku D/MAX-RB (Japan) X-ray diffractometer with Cu-K $\alpha$  radiation ( $\lambda=1.5406 \text{ \AA}$ ). X-ray photoelectron spectroscopy (XPS) was recorded on a PHI 5000 Versa Probe III with Al K $\alpha$  ( $h\nu=1486.6 \text{ eV}$ ) as the excitation source. With reference to C 1s to 284.6 eV, the binding energy obtained in XPS spectra analysis was corrected. Raman spectra of powder samples were recorded on a Renishaw Invia Raman Microscope with a laser excitation wavelength of 532 nm. *In-situ* Raman tests for catalysts were conducted in a homemade electrochemical cell under controlled potentials. The concentration of catalysts was determined by inductively coupled plasma mass spectroscopy (ICP-MS) (Agilent 7700x).

## 1.4. Electrocatalytic Research

### 1.4.1. Electrocatalytic Measurements

electrochemical measurements of OER performance were performed using the CHI 760E Electrochemical Workstation (rotating disk electrode (RDE), electrode area:  $0.07 \text{ cm}^2$ ) with a standard three-electrode system, the RDE as the working electrode, carbon rod as the counter electrode, and a saturated Ag/AgCl electrode (in saturated KCl solution) as the reference electrode. The potentials values used in this study were calculated according to the following equation:  $E \text{ (vs. RHE)} = E_{\text{Ag/AgCl}} + 0.197 \text{ V} + 0.0591 \text{ pH}$ . Overpotentials ( $\eta$ ) were calculated based on the formula  $\eta = E \text{ (vs. RHE)} - 1.23 \text{ V}$ . Current density ( $j$ ) was calculated by dividing the current by the electrode area. The working electrode was prepared according to the following methods. Typically, 4 mg of as-prepared catalyst and 1 mg of activated carbon powder were dispersed in 480  $\mu\text{L}$  deionized (DI) water, 480  $\mu\text{L}$  ethanol, and 40  $\mu\text{L}$  Nafion mixture solution. Then the mixture solution was sonicated for 2 h to form a homogeneous ink. After that, 5  $\mu\text{L}$  of the dispersion was loaded onto the RDE. All the loading mass of the

catalysts on the RDE was about  $0.028 \text{ mg cm}^{-2}$ . Electrocatalytic performances were carried out in 1.0 M KOH. The working electrode was performed with a rotation rate of 1600 rpm. The electrochemical impedance spectroscopy (EIS) measurements were carried out in the same configuration at 1.32 V (vs. RHE) from 0.1 Hz to 100 kHz.

The electrical double layer capacitance ( $C_{dl}$ ) of the samples was measured from double-layer charging curves using cyclic voltammograms (CVs) in a potential range of 1.02-1.12 V in 1.0 M KOH at the scan rate of 10, 20, 30, 40, 50, 60, 70, and  $80 \text{ mV s}^{-1}$ .

#### 1.4.2. Calculation of ECSA-normalized Current Density

The electrochemical surface area (ECSA) is estimated from  $C_{dl}$  of the catalyst. The ECSA-normalized current density ( $j_{ECSA}$ ) is calculated as follows:

$$\text{ECSA} = C_{dl}/C_s$$

$$j_{\text{ECSA}} = j/\text{ECSA}$$

where  $C_s$  is the specific capacitance ( $0.04 \text{ mF cm}^{-2}$  in this work). While  $j$  is the current (mA).<sup>1,2</sup>

#### 1.4.3. Calculation of Mass Activity and TOF

The mass activity (A/g) values were calculated from the catalyst loading  $m$  ( $0.28 \text{ mg cm}^{-2}$ ) and the measured current density  $j$  ( $\text{mA cm}^{-2}$ ) at  $\eta = 268 \text{ mV}$ .

$$\text{Mass activity} = j/m$$

The TOF values were calculated by assuming that every metal atom is involved in the catalysis (lower TOF limits were calculated):

$$\text{TOF} = jS/4Fn$$

Where  $j$  ( $\text{mA cm}^{-2}$ ) is the measured current density at  $\eta=268$  mV,  $S$  ( $0.07 \text{ cm}^2$ ) is the surface area of the glassy carbon electrode, the constant 4 means 4 electrons/mol of  $\text{O}_2$ ,  $F$  is Faraday's constant ( $96485.30 \text{ C/mol}$ ), and  $n$  is the mole of coated metal atom on the electrode calculated from  $m$ , the molecular weight of the coated catalysts.

#### 1.4.4. Measurement of the Faradic Efficiency

The Faradic efficiency for OER was determined by a rotating ring-disk electrode (RRDE) consisting of a glassy carbon disk electrode and a Pt ring electrode. A constant current of  $200 \mu\text{A}$  was applied to the disk electrode, and the ring electrode was held constant at  $0.40 \text{ V}$  vs RHE to reduce  $\text{O}_2$  generated at the disk. The Faradic efficiency ( $f$ ) is calculated using the following equation:

$$f = \frac{I_r}{NI_d}$$

Where  $I_d$  is the disk current and  $I_r$  is the ring current.  $N$  is the current collection efficiency of the RRDE (0.2) determined using the same configuration with an  $\text{IrO}_2$  thin-film electrode.<sup>3,4</sup>



## 2. Supporting Figures and Tables

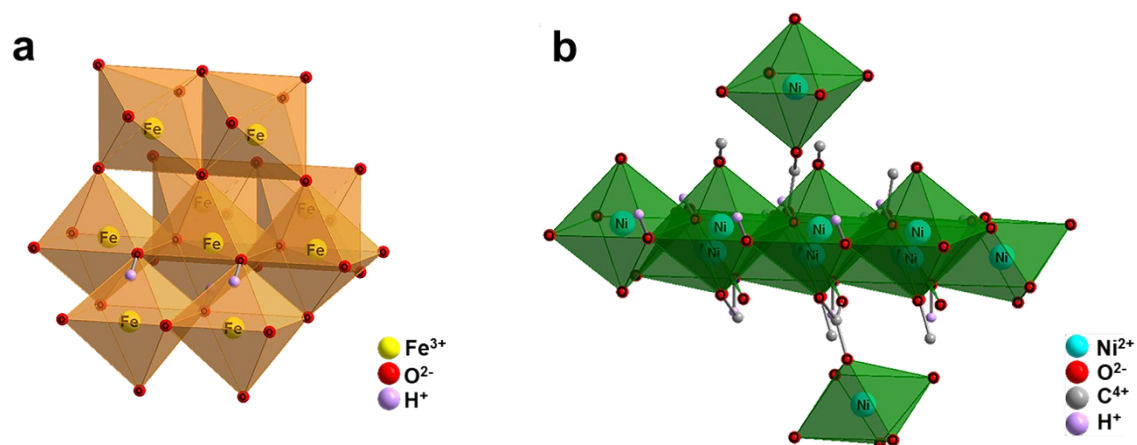

Fig. S1 Crystal structures of (a) FeOOH and (b) Ni<sub>2</sub>(CO<sub>3</sub>)(OH)<sub>2</sub>.

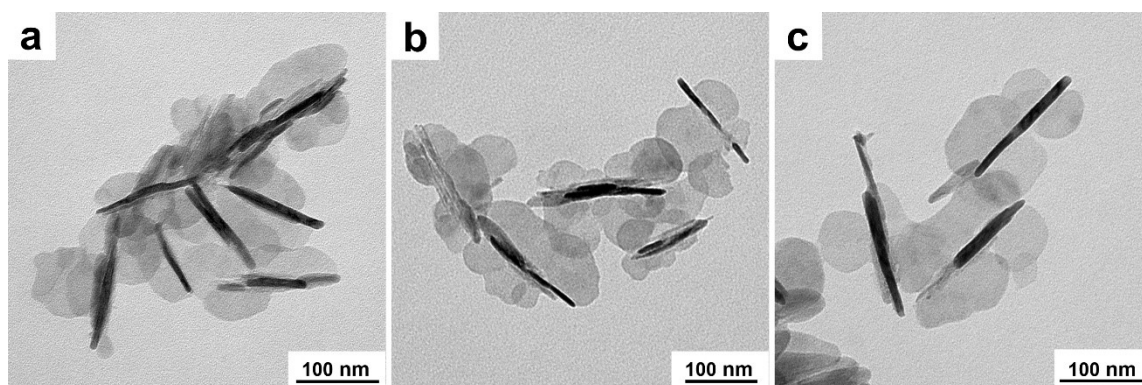

Fig. S2 TEM images of FeNi/Ni HS.

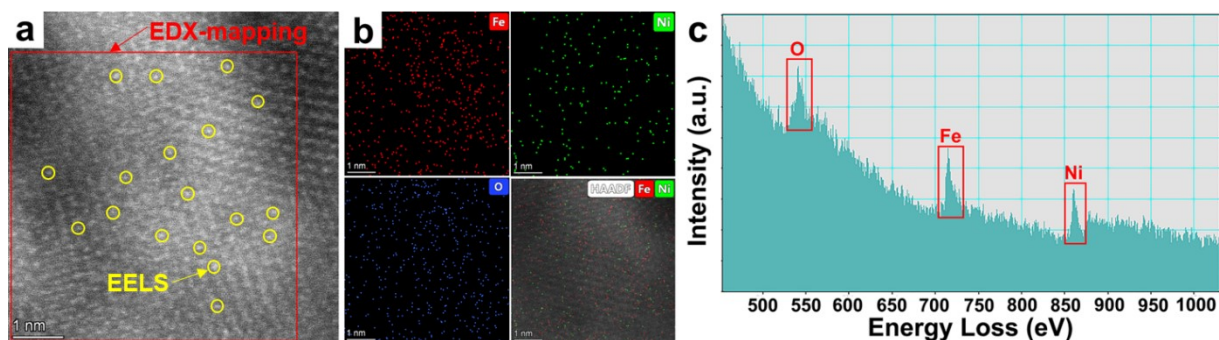

**Fig. S3** Cs-corrected HRTEM characterization of the “torso” region: (a) the HAADF-STEM. The red rectangular box is the EDX-mapping collection area, and the yellow circles indicate where the EELS data were collected. (b) the high-resolution EDX-mapping, (c) the spot-scanning EELS. The Fe and O signals are clearly shown in EELS spectrum because FeOOH as substrate is present in a large quantity.

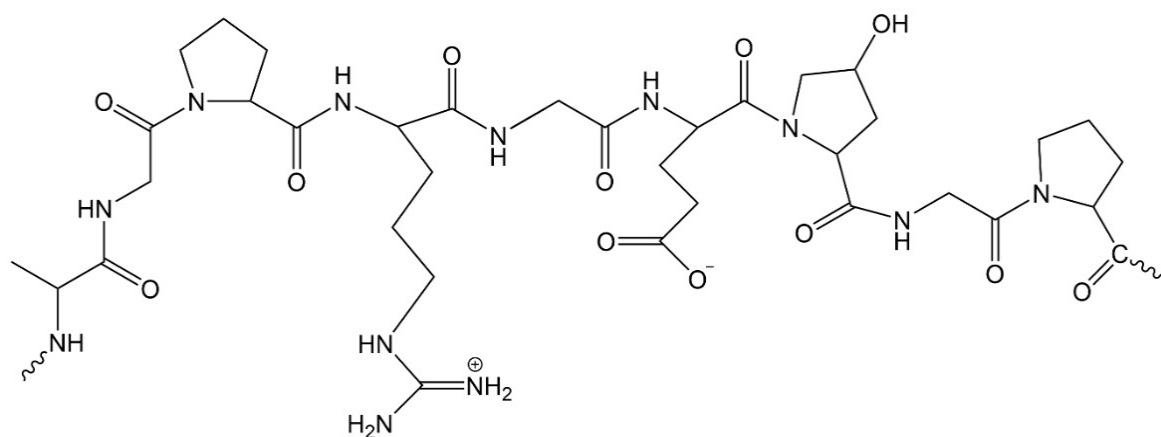

**Fig. S4** The basic molecular unit of gelatin.

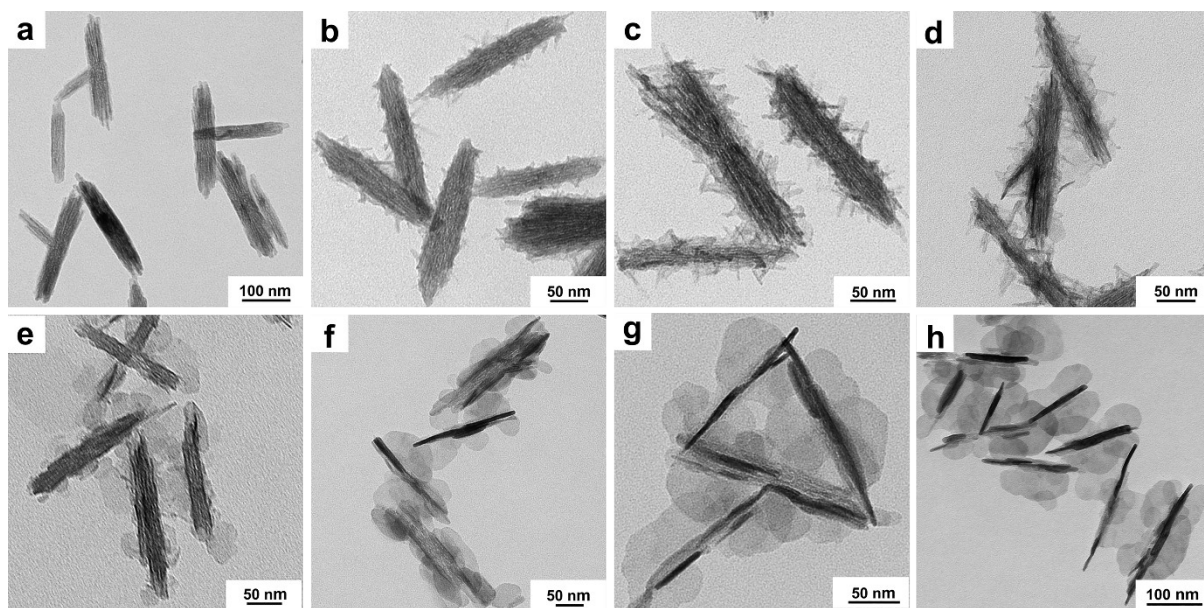

**Fig. S5** Growth characteristics of FeNi/Ni HS over a course of 36 h. (a) 3 h, (b) 6 h, (c) 12 h, (d) 18 h, (e) 21 h, (f) 27 h, (g) 33 h, (h) 36 h.

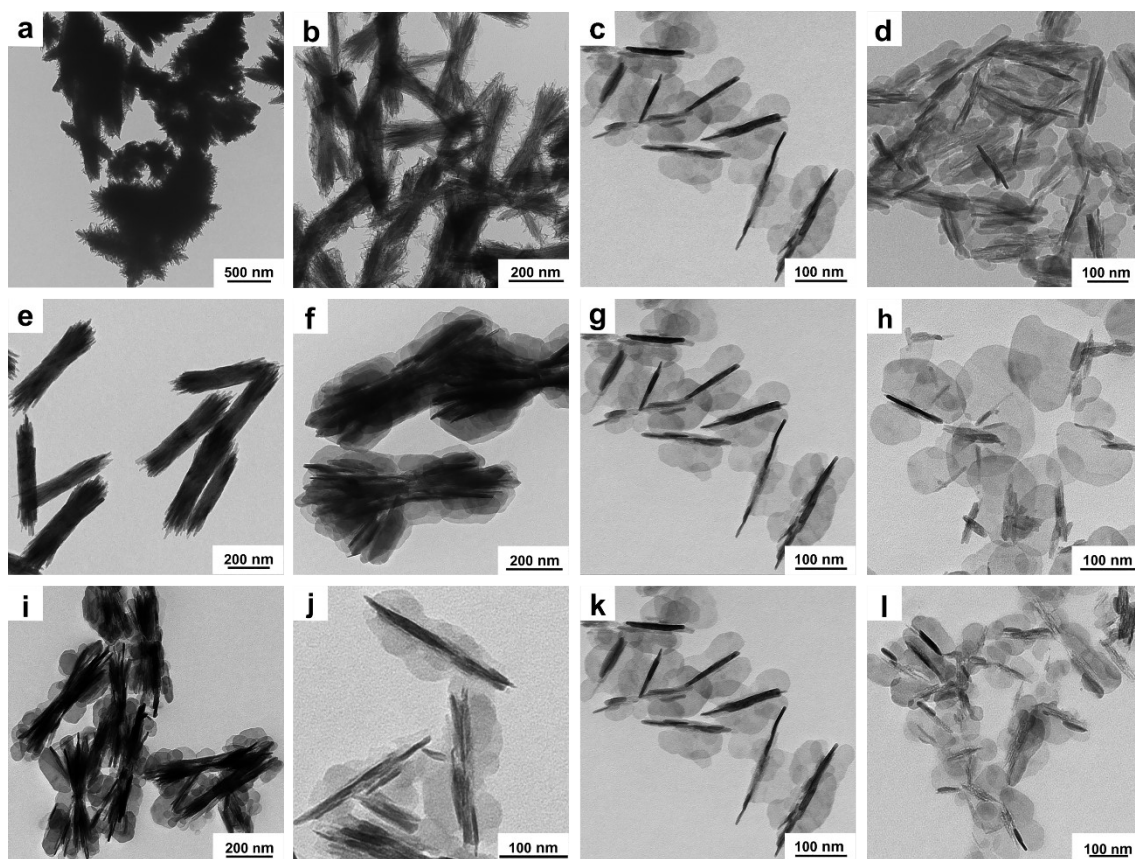

**Fig. S6** Other conditions-dependent growth characteristics of FeNi/Ni HS. (a-d) After reaction for 36 h, with different dosages of gelatin (urea=8 g,  $\text{NiCl}_2 \cdot 6\text{H}_2\text{O}/\text{FeCl}_3 \cdot 6\text{H}_2\text{O}=3/2$ ): (a) gelatin=0 mL, (b) gelatin=4 mL, (c) gelatin=8 mL, (d) gelatin=16 mL. (e-h) After reaction for 36 h, with different dosages of urea (gelatin=8 mL,  $\text{NiCl}_2 \cdot 6\text{H}_2\text{O}/\text{FeCl}_3 \cdot 6\text{H}_2\text{O}=3/2$ ): (e) urea=0 g, (f) urea=4 g, (g) urea=8 g, (h) urea=16 g. (i-l) After reaction for 36 h, with different precursor mole ratios (urea=8 g, gelatin=8 mL): (i)  $\text{NiCl}_2 \cdot 6\text{H}_2\text{O}/\text{FeCl}_3 \cdot 6\text{H}_2\text{O}=1/2$ , (j)  $\text{NiCl}_2 \cdot 6\text{H}_2\text{O}/\text{FeCl}_3 \cdot 6\text{H}_2\text{O}=1/1$ , (k)  $\text{NiCl}_2 \cdot 6\text{H}_2\text{O}/\text{FeCl}_3 \cdot 6\text{H}_2\text{O}=3/2$ , (l)  $\text{NiCl}_2 \cdot 6\text{H}_2\text{O}/\text{FeCl}_3 \cdot 6\text{H}_2\text{O}=2/1$ .

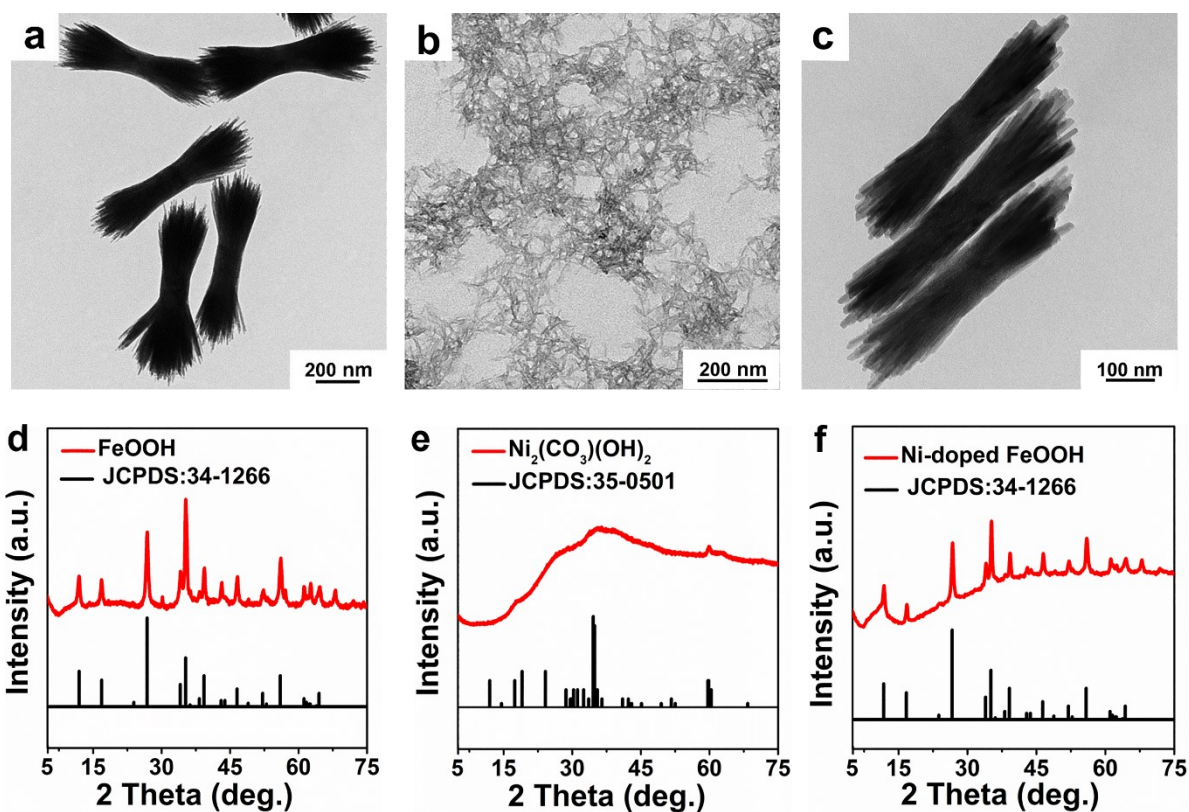

**Fig. S7** Morphological and structural characterizations of the compared samples. TEM images of (a) FeOOH, (b)  $\text{Ni}_2(\text{CO}_3)(\text{OH})_2$ , and (c) Ni-FeOOH; XRD patterns of (d) FeOOH, (e)  $\text{Ni}_2(\text{CO}_3)(\text{OH})_2$ , and (f) Ni-FeOOH.

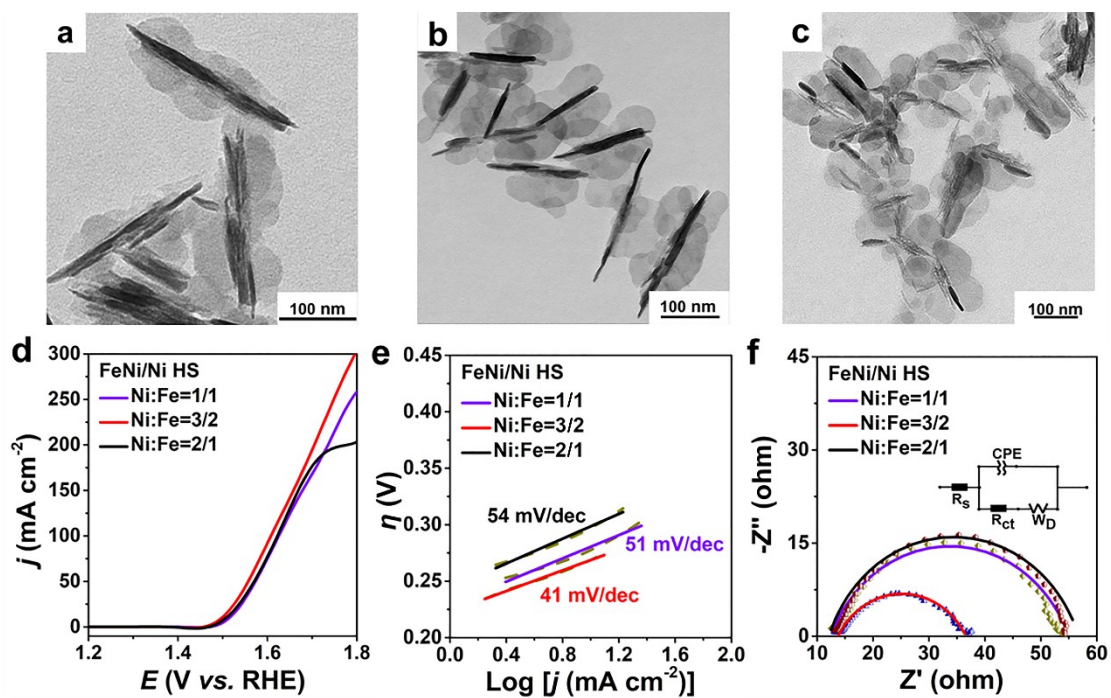

**Fig. S8** TEM images of different FeNi/Ni HS more ratios (a) Ni:Fe=1:1, (b) Ni:Fe=3:2, (c) Ni:Fe=2:1. Comparative electrochemical studies: (d) Liner sweep voltammetry (LSV), (e) Tafel plots ( $\log j - \eta$ ), (f) Nyquist plots.

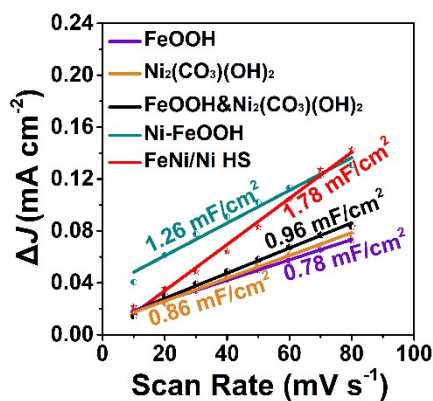

**Fig. S9**  $C_{dl}$  calculations of catalysts.

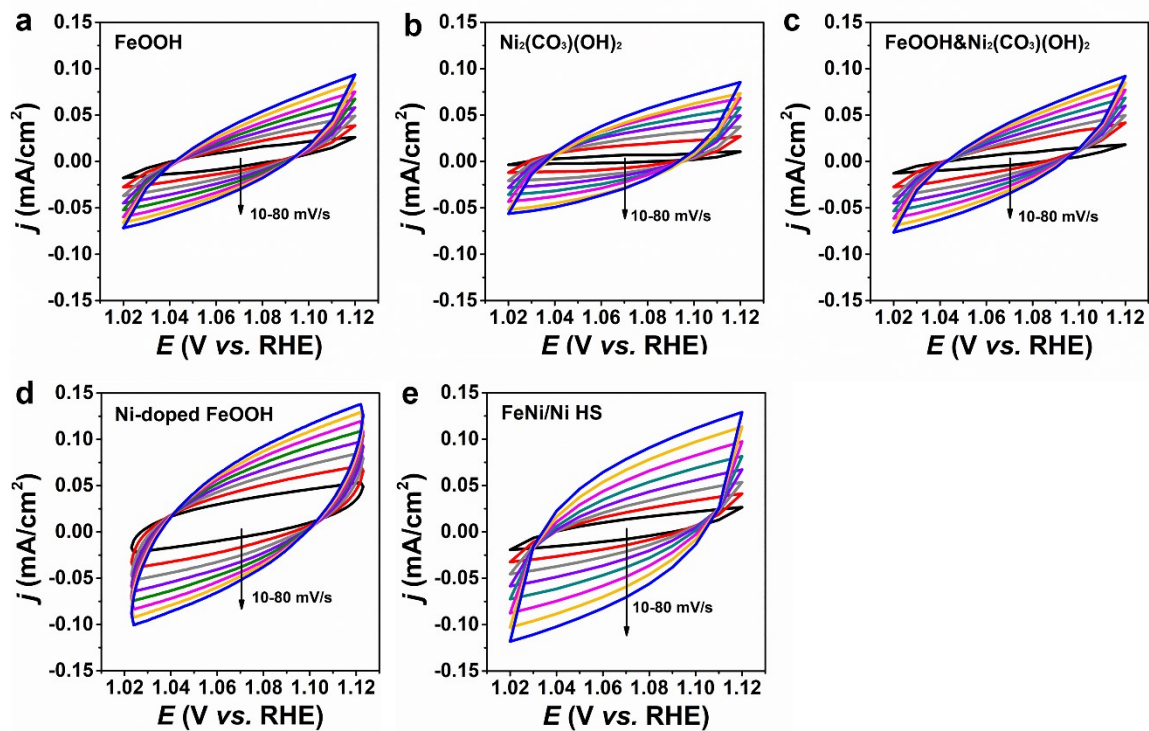

**Fig. S10** Typical cyclic voltammetry curves of (a) FeOOH, (b) Ni<sub>2</sub>(CO<sub>3</sub>)(OH)<sub>2</sub>, (c) FeOOH&Ni<sub>2</sub>(CO<sub>3</sub>)(OH)<sub>2</sub>, (d) Ni-FeOOH and (e) FeNi/Ni HS in 1.0 M KOH with different scan rates (10-80 mV/s).

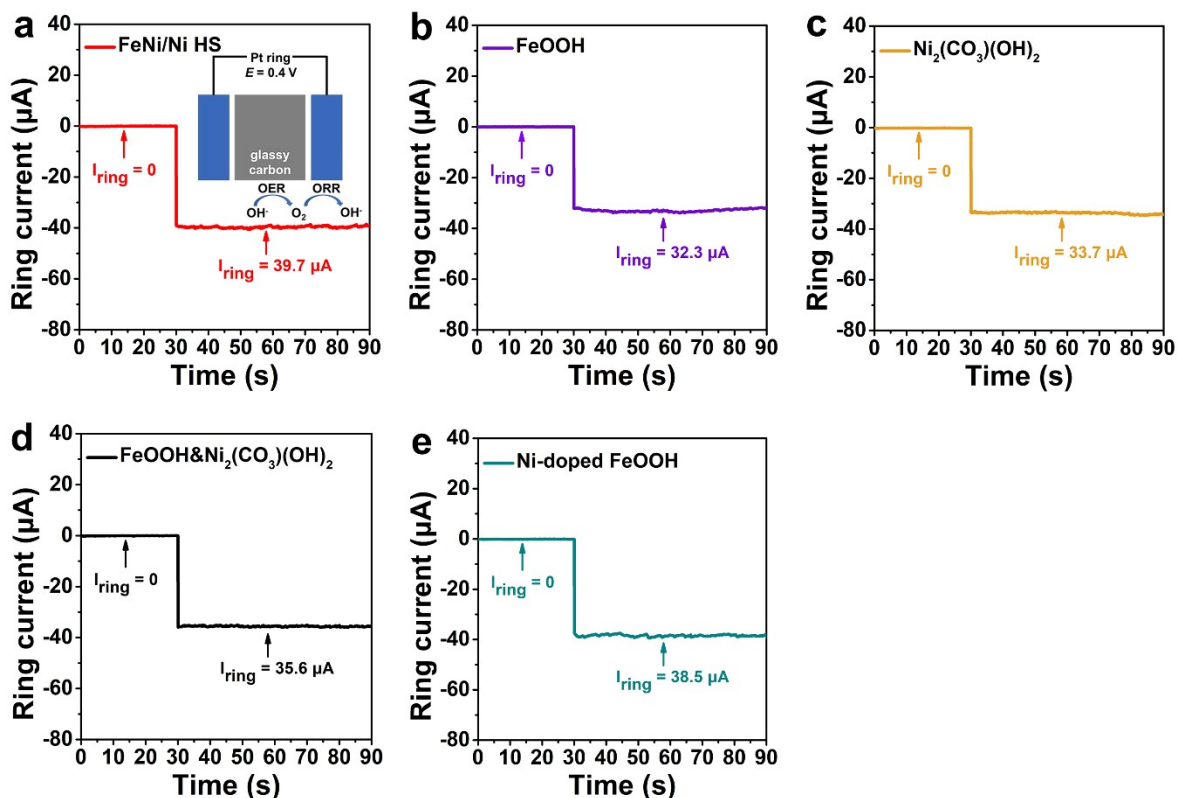

**Fig. S11** Ring current measurements: (a) FeNi/Ni HS, (b) FeOOH, (c)  $\text{Ni}_2(\text{CO}_3)(\text{OH})_2$ , (d)  $\text{FeOOH}\&\text{Ni}_2(\text{CO}_3)(\text{OH})_2$ , and (e) Ni-doped FeOOH, all being on an RRDE (1600 rpm) in  $\text{N}_2$ -saturated 1.0 M KOH solution (ring potential at 0.40 V vs. RHE).

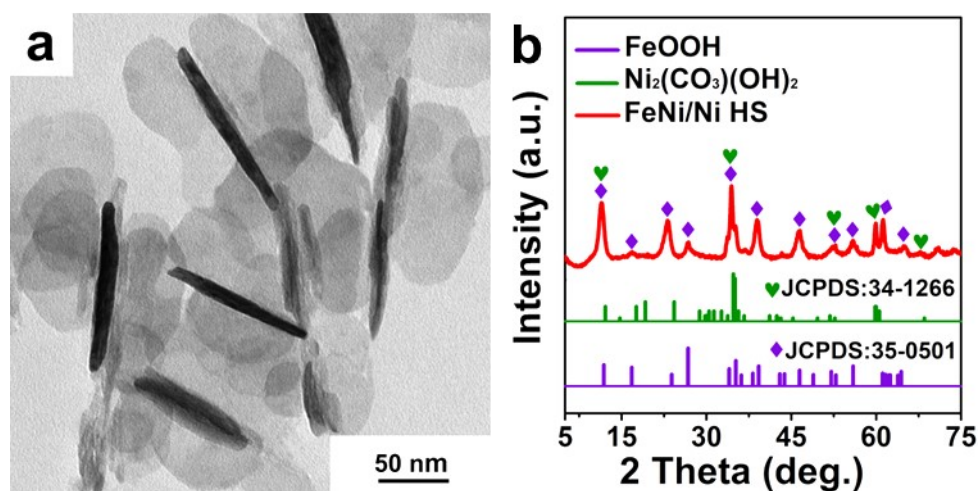

**Fig. S12** Morphological and structural characterizations of FeNi/Ni HS recovered after the 40-h test. (a) TEM image. (b) XRD patterns.



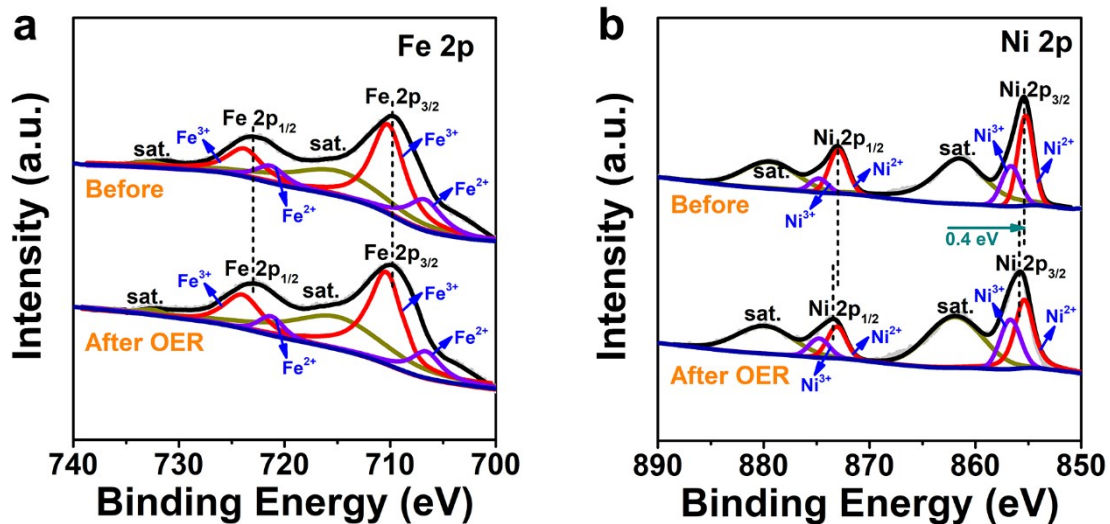

Fig. S13 XPS spectra of (a) Fe 2p, (b) Ni 2p for FeNi/Ni HS before and after the OER tests.

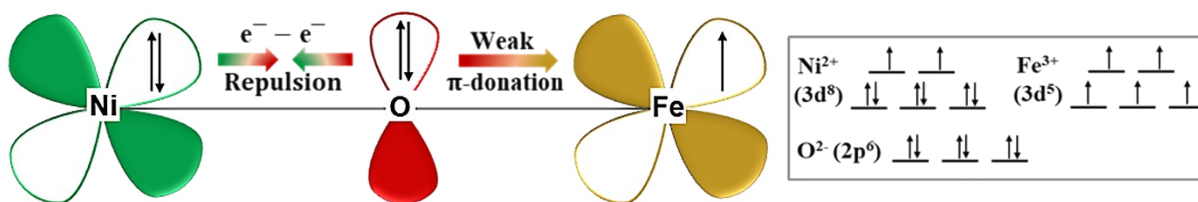

Fig. S14 Schematics of the electronic interplay between Ni and Fe via oxo bridge in FeNi/Ni HS.

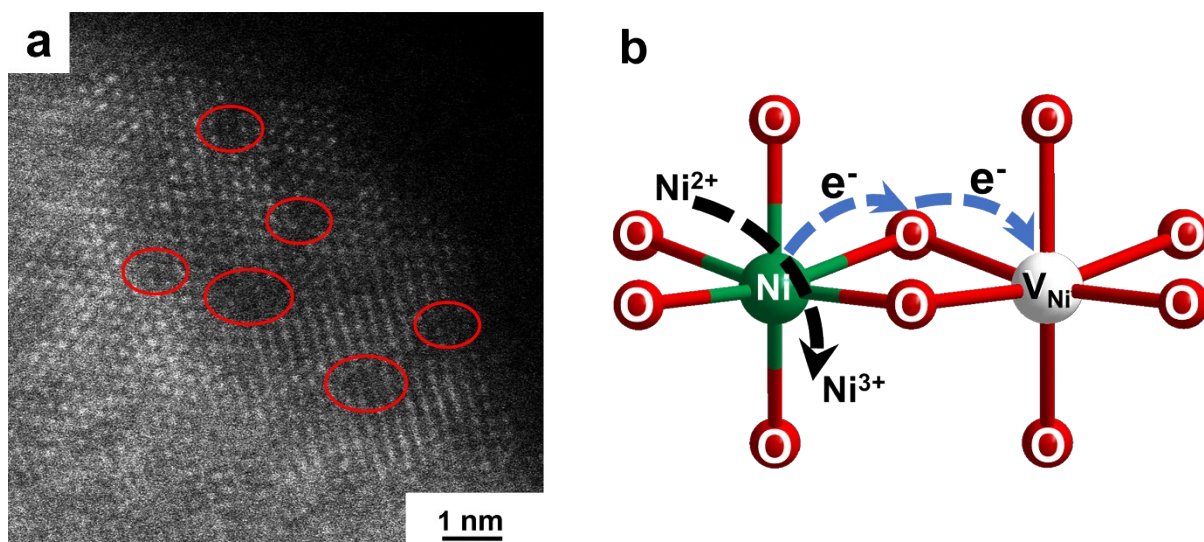

**Fig. S15** The characterizations of Ni vacancies in the “wing” Region C. (a) HAADF-STEM image. (b) Electron transfer of Ni vacancies.

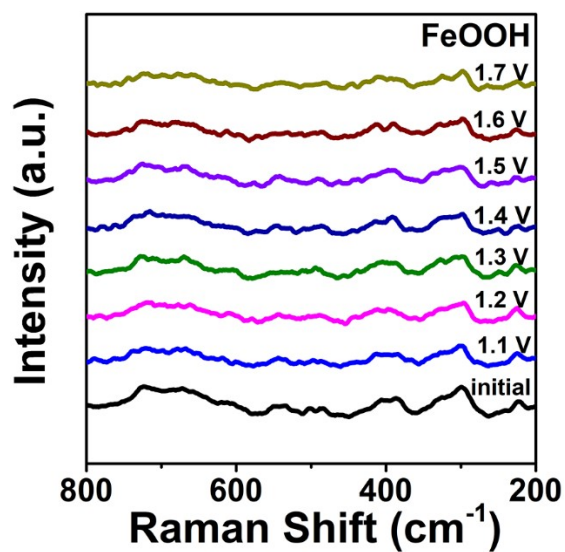

**Fig. S16** *In-situ* Raman spectra of FeOOH at different voltages.

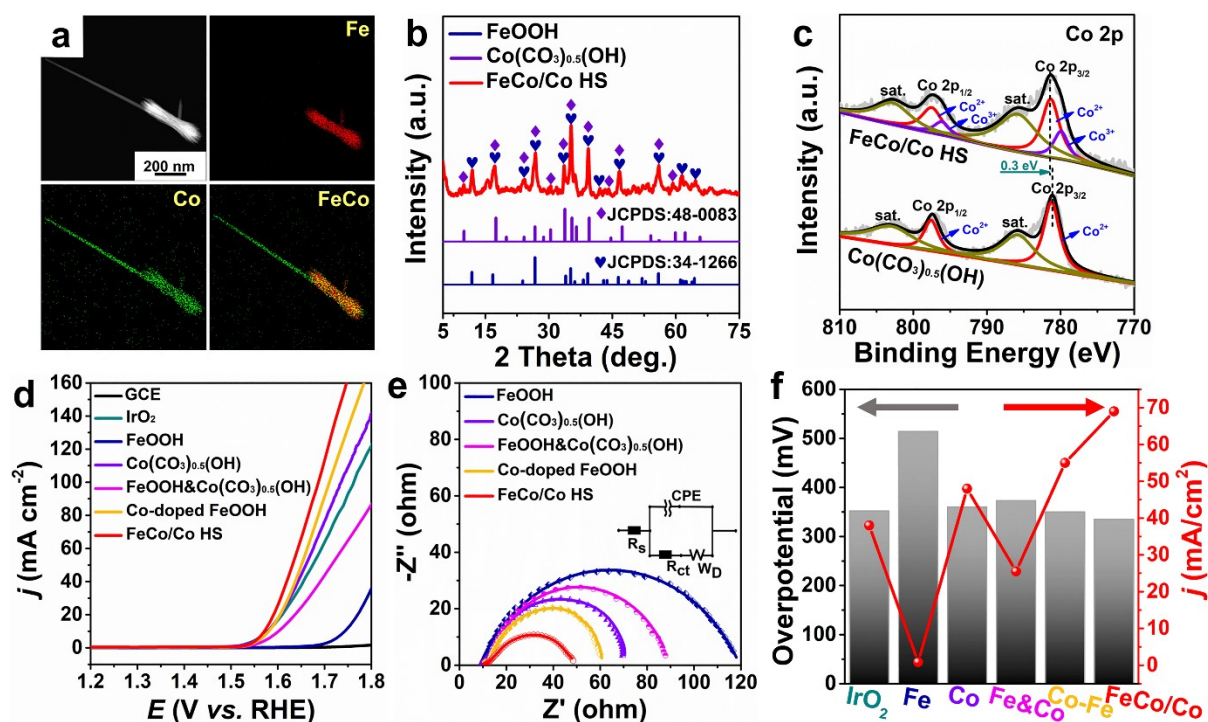

**Fig. S17** Characterization and properties of FeCo/Co HS. (a) HAADF-STEM image and EDX elemental maps. (b) XRD patterns. (c) XPS spectrum of Co 2p. (d) Polarization curves. (e) Nyquist plots. (f) Overpotential at 10 mA cm<sup>-2</sup> and current density at 1.65 V vs. RHE derived from the LSV curves.

The HAADF-STEM image (Fig. S17a) exhibited a saber-like structure, in which the hilt is about 400 nm length and 100 nm width, and the sword body is about 600 nm length and 20 nm width. EDX-mapping showed Co element throughout the structure, while Fe only in the hilt. XRD (Fig. S17b) confirmed the heterostructure consists of FeOOH (JCPDS: 34-1266) and Co(CO<sub>3</sub>)<sub>0.5</sub>(OH) (JCPDS: 48-0083). The Co 2p XPS spectra (Fig. S17c) of FeCo/Co HS is fitted into two pairs of peaks, corresponding to Co<sup>2+</sup> (781.2 eV, 797.5eV) and Co<sup>3+</sup> (780.0eV, 796.3eV),<sup>5,6</sup> compare to Co(CO<sub>3</sub>)<sub>0.5</sub>(OH), the binding energies of FeCo/Co HS exhibit positive shifts (0.3 eV), demonstrating in higher valence Co<sup>3+</sup> in the heterostructures. LSV (Fig. S17d)

showed that the onset overpotential of FeCo/Co HS is 270 mV, which is the smallest in comparison groups. EIS (Fig. S17e) demonstrates that  $R_{ct}$  of FeCo/Co HS is also the smallest indicating superior charge transfer kinetics. Fig. S17f showed FeCo/Co HS exhibits the smallest overpotential and the largest current density, which again demonstrates its excellent catalytic activity.

**Table S1.** ICP analysis of FeNi/Ni HS with different metal ratios.

| Catalysts             | Ni (wt.%) | Fe (wt.%) | Ni/Fe     |
|-----------------------|-----------|-----------|-----------|
| FeNi/Ni HS(Ni:Fe=1/1) | 20.21     | 22.83     | 1.00/1.13 |
| FeNi/Ni HS(Ni:Fe=3/2) | 22.48     | 15.16     | 2.97/2.00 |
| FeNi/Ni HS(Ni:Fe=2/1) | 23.74     | 12.18     | 1.95/1.00 |

**Table S2.** Changes in metal content of FeNi/Ni HS over a course of 36 hours.

| Time | Ni (wt.%) | Fe (wt.%) |
|------|-----------|-----------|
| 3 h  | 19.84     | 80.16     |
| 6 h  | 38.97     | 61.03     |
| 18 h | 50.97     | 49.03     |
| 36 h | 61.14     | 38.96     |

**Table S3.** Comparisons of the electrocatalytic performance with reported catalysts.

| Electrocatalyst                                                   | Medium    | Oset potential (V vs. RHE) | Overpotential <sup>a</sup> (mV) | Stability <sup>b</sup> (h) | Reference                                                    |
|-------------------------------------------------------------------|-----------|----------------------------|---------------------------------|----------------------------|--------------------------------------------------------------|
| FeNi/Ni HS                                                        | 1.0 M KOH | 1.45                       | 268                             | 40                         | This work                                                    |
| Fe-CoOOH/G <sup>7</sup>                                           | 1.0 M KOH | 1.51                       | 330                             | 5                          | <i>Adv. Energy Mater.</i> 2017, <b>7</b> , 1602148.          |
| CoNi(OH) <sub>x</sub> <sup>8</sup>                                | 1.0 M KOH | 1.48                       | 280                             | 24                         | <i>Adv. Energy Mater.</i> 2016, <b>6</b> , 150166.           |
| $\alpha$ -Co <sub>4</sub> Fe(OH) <sub>x</sub> <sup>9</sup>        | 1.0 M KOH | 1.48                       | 295                             | 3                          | <i>J. Mater. Chem. A</i> , 2017, <b>5</b> , 1078-1084.       |
| NiCo LDH <sup>10</sup>                                            | 1.0 M KOH | 1.53                       | 367                             | 6                          | <i>Nano Lett.</i> 2015, <b>15</b> , 1421-1427.               |
| NiCo <sub>2.7</sub> (OH) <sub>x</sub> <sup>11</sup>               | 1.0 M KOH | 1.48                       | 350                             | 10                         | <i>Adv. Energy Mater.</i> 2015, <b>5</b> , 1401880.          |
| Fe-CoOOH/G <sup>12</sup>                                          | 1.0 M KOH | 1.50                       | 330                             | 6                          | <i>Adv. Energy Mater.</i> 2017, <b>7</b> , 1602148.          |
| FeOOH(Se)/IF <sup>13</sup>                                        | 1.0 M KOH | 1.49                       | 287                             | 14                         | <i>J. Am. Chem. Soc.</i> 2019, <b>141</b> , 7005-7013.       |
| Co(OH) <sub>2</sub> @NCNTs@NF <sup>14</sup>                       | 1.0 M KOH | 1.40                       | 270                             | 200                        | <i>Nano Energy</i> 2018, <b>47</b> , 96-104.                 |
| Fe-CoNi LDH <sup>15</sup>                                         | 1.0 M KOH | 1.45                       | 260                             | 12                         | <i>Appl. Surf. Sci.</i> 2021, <b>565</b> , 150506.           |
| NiCo LDH <sup>16</sup>                                            | 1.0 M KOH | 1.40                       | 264                             | 25                         | <i>Nano Res.</i> 2022, <b>15</b> , 4986-4995.                |
| NiCo-LDH/ZnCo <sub>2</sub> O <sub>4</sub> <sup>17</sup>           | 1.0 M KOH | 1.47                       | 260                             | /                          | <i>J. Colloid Interface Sci.</i> 2021, <b>604</b> , 832-843. |
| Fe <sub>0.33</sub> Co <sub>0.67</sub> OOH PNSAs/CFC <sup>18</sup> | 1.0 M KOH | 1.45                       | 266                             | 24                         | <i>Angew. Chem. Int. Ed.</i> 2018, <b>57</b> , 2672-2676.    |
| ZNDP-1 <sup>19</sup>                                              | 1.0 M KOH | 1.30                       | 170                             | /                          | <i>Appl. Surf. Sci.</i> 2021, <b>562</b> , 150253.           |
| NiFeV nanofibers <sup>20</sup>                                    | 1.0 M KOH | 1.41                       | 263                             | /                          | <i>Angew. Chem. Int. Ed.</i>                                 |

2022, **61**, e2021153.

|                             |           |      |     |                               |                                                              |
|-----------------------------|-----------|------|-----|-------------------------------|--------------------------------------------------------------|
| Nb-NiFe-LDH <sup>21</sup>   | 1.0 M KOH | 1.34 | 242 | 73 (100 mA cm <sup>-2</sup> ) | <i>Chem. Eng. J.</i> 2022, <b>427</b> , 131643.              |
| FeBi@FeNi LDH <sup>22</sup> | 1.0 M KOH | 1.47 | 246 | 90 (100 mA cm <sup>-2</sup> ) | <i>J. Colloid Interface Sci.</i> 2022, <b>610</b> , 173-181. |

---

<sup>a</sup> Overpotential at a current density of 10mA cm<sup>-2</sup>; <sup>b</sup> Stability at a current density of 10 mA cm<sup>-2</sup>.

### 3. Reference

1. X. H. Sun, Q. Shao, Y. C. Pi, J. Guo, X. Q. Huang, *J. Mater. Chem. A*, 2017, **5**, 7769.
2. D. Voiry, M. Chhowalla, Y. Gogotsi, N. A. Kotov, Y. Li, R. M. Penner, R. E. Schaak, P. S. Weiss, *ACS Nano* 2018, **12**, 9635-9638.
3. H. L. Fei, J. C. Dong, Y. X. Feng, C. S. Allen, C. Z. Wan, B. Voloskiy, M. F. Li, Z. P. Zhao, Y. L. Wang, H. T. Sun, P. F. An, W. X. Chen, Z. Y. Guo, C. Lee, D. L. Chen, I. Shakir, M. J. Liu, T. D. Hu, Y. D. Li, A. I. Kirkland, X. F. Duan, Y. Huang, *Nat. Catal.* 2018, **1**, 63.
4. T. Y. Ma, S. Dai, M. Jaroniec, S. Z. Qiao, *J. Am. Chem. Soc.* 2014, **136**, 13925.
5. L. Hui, Y. Xue, D. Jia, Yu, H.; Zhang, C.; Li, Y. *Adv. Energy Mater.* 2018, **8**, 1800175.
6. P. W. Menezes, S. Yao, R. Beltran-Suito, J. N. Hausmann, P. V. Menezes, M. Driess, *Angew. Chem. Int. Ed.* 2021, **60**, 4640-4647.
7. X. T. Han, C. Yu, S. Zhou, C. T. Zhao, H. W. Huang, J. Yang, Z. B. Liu, J. J. Zhao, J. S. Qiu, *Adv. Energy Mater.* 2017, **7**, 1602148.
8. S. W. Li, Y. C. Wang, S. J. Peng, L. J. Zhang, A. M. Al-Enizi, H. Zhang, X. H. Sun, G. F. Zheng, *Adv. Energy Mater.* 2016, **6**, 150166.
9. H. Y. Jin, S. J. Mao, G. P. Zhan, F. Xu, X. B. Bao, Y. Wang, *J. Mater. Chem. A*, 2017, **5**, 1078-1084.
10. H. F. Liang, F. Meng, M. C. Acevedo, L. S. Li, A. Forticaux, L. C. Xiu, Z. C. Wang, S. Jin, *Nano Lett.* 2015, **15**, 1421-1427.
11. J. W. Nai, H. J. Yin, T. T. You, L. R. Zheng, J. Zhang, P. X. Wang, Z. Jin, Y. Tian, J. Z. Liu, Z. Y. Tang, L. Guo, *Adv. Energy Mater.* 2015, **5**, 1401880.
12. X. Han, C. Yu, S. Zhou, C. Zhao, H. Huang, J. Yang, Z. Liu, J. Zhao, J. Qiu, *Adv. Energy Mater.* 2017, **7**, 1602148.
13. S. Niu, W. J. Jiang, Z. X. Wei, T. Tang, J. M. Ma, J. S. Hu, L. J. Wan, *J. Am. Chem. Soc.* 2019, **141**, 7005-7013.
14. P. Guo, J. Wu, X. B. Li, J. Luo, W. M. Lau, H. Liu, X. L. Sun, L. M. Liu, *Nano Energy* 2018, **47**, 96-104.
15. Y. L. Shi, J. Q. Li, B. Y. Zhang, S. Y. Lv, T. Wang, X. Liu, *Appl. Surf. Sci.* 2021, **565**, 150506.

16. J. H. Li, L. L. Wang, H. J. He, Y. Q. Chen, Z. R. Gao, N. Ma, B. Wang, L. L. Zheng, R. L. Li, Y. J. Wei, J. Q. Xu, Y. Xu, B. W. Cheng, Z. Yin, D. Ma, *Nano Res.* 2022, **15**, 4986-4995.
17. M. Shamloofard, S. Shahrokhian, M. K. Amini, *J. Colloid Interface Sci.* 2021, **604**, 832-843.
18. S. H. Ye, Z. X. Shi, J. X. Feng, Y. X. Tong, G. R. Li, *Angew. Chem. Int. Ed.* 2018, **57**, 2672-2676.
19. J. Jana, K. C. Bhamu, Y. T. Ngo, S. G. Kang, J. S. Chuang, *Appl. Surf. Sci.* 2021, **562**, 150253.
20. B. Zhang, Z. H. Wu, W. J. Shao, Y. Gao, W. W. Wang, T. Ma, L. Ma, S. Li, C. Cheng, C. S. Zhao, *Angew. Chem. Int. Ed.* 2022, **61**, e2021153.
21. Y. N. Zhou, F. L. Wang, S. Y. Dou, Z. N. Shi, B. Dong, *Chem. Eng. J.* 2022, **427**, 131643.
22. F. G. Wang, B. Liu, H. Y. Wang, Z. Y. Lin, Y. W. Dong, N. Yu, R. N. Luan, Y. M. Chai, B. Dong, *J. Colloid Interface Sci.* 2022, **610**, 173-181.
